# Supplementary material
Source: PubMed Central journal article supplement (PMC2849384)
Supplement: supp_54_4_1393__1.pdf [file supp_54_4_1393__1.pdf]

SUPPLEMENTARY TABLE 1. Ciprofloxacin sensitive strains

| Gene        | CIP | Categ | MIC ng/ml |
|-------------|-----|-------|-----------|
| BW25113     |     |       | 20        |
| <i>recA</i> |     | 1     | 2         |
| <i>recB</i> |     | 1     | 5         |
| <i>recC</i> |     | 1     | 5         |
| <i>recG</i> |     | 1     | 5         |
| <i>recN</i> |     | 1     | 5         |
| <i>uvrD</i> |     | 1     | 5         |
| <i>xseA</i> |     | 1     | 5         |
| <i>xseB</i> |     | 1     | 5         |
| <i>acrA</i> |     | 2     | 5         |
| <i>acrB</i> |     | 2     | 5         |
| <i>nlpC</i> |     | 2     | 5         |
| <i>tolC</i> |     | 2     | 5         |
| <i>glfI</i> |     | 4     | 5         |
| <i>lpdA</i> |     | 4     | 5         |
| <i>rutA</i> |     | 4     | 5         |
| <i>ygcO</i> |     | 4     | 5         |
| <i>dksA</i> |     | 5     | 5         |
| <i>yciT</i> |     | 5     | 5         |
| <i>pgaC</i> |     | 7     | 5         |
| <i>ybjQ</i> |     | 7     | 5         |
| <i>ydeS</i> |     | 7     | 5         |
| <i>yijU</i> |     | 7     | 5         |
| <i>fis</i>  |     | 1     | 6         |
| <i>lpxL</i> |     | 2     | 5-7.5     |
| <i>ycjU</i> |     | 4     | 5-7.5     |
| <i>dcuC</i> |     | 2     | 7.5       |
| <i>lpp</i>  |     | 2     | 7.5       |
| <i>qmcA</i> |     | 2     | 7.5       |
| <i>hlpA</i> |     | 2A    | 7.5       |
| <i>alaS</i> |     | 3     | 7.5       |
| <i>rimK</i> |     | 3     | 7.5       |
| <i>rplA</i> |     | 3     | 7.5       |
| <i>ybgF</i> |     | 3     | 7.5       |
| <i>mfd</i>  |     | 5     | 7.5       |
| <i>yciM</i> |     | 7     | 7.5       |
| <i>bamB</i> |     | 2     | >7.5      |
| <i>envC</i> |     | 2     | >7.5      |
| <i>envZ</i> |     | 2     | >7.5      |
| <i>proW</i> |     | 2     | >7.5      |
| <i>tatB</i> |     | 2     | >7.5      |
| <i>tatC</i> |     | 2     | >7.5      |
| <i>yheL</i> |     | 2     | >7.5      |
| <i>dnaK</i> |     | 2A    | >7.5      |
| <i>hscB</i> |     | 2A    | >7.5      |
| <i>fepC</i> |     | 4     | >7.5      |
| <i>typA</i> |     | 4     | >7.5      |
| <i>ybhT</i> |     | 7     | >7.5      |
| <i>ybjJ</i> |     | 7     | >7.5      |
| <i>ycbW</i> |     | 7     | >7.5      |
| <i>yehJ</i> |     | 7     | >7.5      |
| <i>yfgC</i> |     | 3     | 8.75      |
| <i>hfq</i>  |     | 5     | 8.75      |
| <i>ihfA</i> |     | 5     | 8.75      |
| <i>yjjY</i> |     | 7     | 8.75      |
| <i>ruvC</i> |     | 1     | >8.75     |
| <i>hrpA</i> |     | 1A    | >8.75     |
| <i>ybgC</i> |     | 4     | >8.75     |
| <i>ruvA</i> |     | 1     | 10        |

SUPPLEMENTARY TABLE 2. Enoxacin sensitive strains

| Gene        | ENX | Categ | MIC ng/ml |
|-------------|-----|-------|-----------|
| BW25113     |     |       | 200       |
| <i>recA</i> |     | 1     | 50        |
| <i>recB</i> |     | 1     | 50        |
| <i>recC</i> |     | 1     | 50        |
| <i>recG</i> |     | 1     | 50        |
| <i>recN</i> |     | 1     | 50        |
| <i>xseA</i> |     | 1     | 50        |
| <i>xseB</i> |     | 1     | 50        |
| <i>acrA</i> |     | 2     | 50        |
| <i>nlpC</i> |     | 2     | ≤75       |
| <i>pgaC</i> |     | 4     | ≤75       |
| <i>ycjU</i> |     | 4     | ≤75       |
| <i>ybjQ</i> |     | 7     | ≤75       |
| <i>qmcA</i> |     | 2     | 75        |
| <i>tolC</i> |     | 2     | 75        |
| <i>ybgF</i> |     | 2     | 75        |
| <i>rimK</i> |     | 3     | 75        |
| <i>ygcO</i> |     | 4     | 75        |
| <i>dksA</i> |     | 5     | 75        |
| <i>yciT</i> |     | 5     | 75        |
| <i>yciM</i> |     | 7     | 75        |
| <i>uvrD</i> |     | 1     | ≥75       |
| <i>fis</i>  |     | 1A    | ≥75       |
| <i>acrB</i> |     | 2     | ≥75       |
| <i>envC</i> |     | 2     | ≥75       |
| <i>hlpA</i> |     | 2A    | ≥75       |
| <i>rseA</i> |     | 5     | ≥75       |
| <i>ybhT</i> |     | 7     | ≥75       |
| <i>gtI</i>  |     | 2     | >75       |
| <i>lpxL</i> |     | 2     | >75       |
| <i>ybjJ</i> |     | 2     | >75       |
| <i>dusB</i> |     | 3     | >75       |
| <i>rutA</i> |     | 4     | >75       |
| <i>oxyR</i> |     | 5     | >75       |
| <i>xapR</i> |     | 5     | >75       |
| <i>ylcG</i> |     | 6     | >75       |
| JW5115      |     | 7     | >75       |
| <i>ycbW</i> |     | 7     | >75       |
| <i>yehJ</i> |     | 7     | >75       |
| <i>yjjY</i> |     | 7     | >75       |
| <i>bamB</i> |     | 2     | 100       |
| <i>dedD</i> |     | 2     | 100       |
| <i>lpxM</i> |     | 2     | 100       |
| <i>surA</i> |     | 2A    | 100       |
| <i>yfgC</i> |     | 3     | 100       |
| <i>gpmM</i> |     | 4     | 100       |
| <i>hfq</i>  |     | 5     | 100       |
| <i>ubiG</i> |     | 4     | ≥100      |
| <i>proW</i> |     | 2     | >100      |
| <i>seqA</i> |     | 2     | >100      |

SUPPLEMENTARY TABLE 3. Nitrofurantoin sensitive strains

| Gene          | NIT | Categ | MIC µg/ml | Gene          | NIT | Categ | MIC µg/ml | Gene          | NIT | Categ | MIC µg/ml |
|---------------|-----|-------|-----------|---------------|-----|-------|-----------|---------------|-----|-------|-----------|
| BW25113       |     |       | 10        | <i>seqA</i>   |     | 5     | 3.5       | <i>ftsP</i>   |     | 1A    | >4        |
| <i>uvrA</i>   |     | 1     | 1         | <i>yciT</i>   |     | 5     | 3.5       | <i>csgG</i>   |     | 2     | >4        |
| <i>recO</i>   |     | 1     | 2         | <i>ygfS</i>   |     | 1A    | 3.5-4     | <i>ddlB</i>   |     | 2     | >4        |
| <i>uvrC</i>   |     | 1     | 2         | <i>ecnB</i>   |     | 2     | 3.5-4     | <i>fepB</i>   |     | 2     | >4        |
| <i>uvrD</i>   |     | 1     | 2         | <i>lpxL</i>   |     | 2     | 3.5-4     | <i>gltI</i>   |     | 2     | >4        |
| <i>dinG</i>   |     | 1     | 3         | <i>nlpC</i>   |     | 2     | 3.5-4     | <i>ompF</i>   |     | 2     | >4        |
| <i>fis</i>    |     | 1     | 3         | <i>wbbL</i>   |     | 2     | 3.5-4     | <i>plsX</i>   |     | 2     | >4        |
| <i>recA</i>   |     | 1     | 3         | <i>ybjP</i>   |     | 2     | 3.5-4     | <i>proV</i>   |     | 2     | >4        |
| <i>recB</i>   |     | 1     | 3         | <i>ydcX</i>   |     | 2     | 3.5-4     | <i>pstS</i>   |     | 2     | >4        |
| <i>recC</i>   |     | 1     | 3         | <i>ibpB</i>   |     | 2A    | 3.5-4     | <i>rfaY</i>   |     | 2     | >4        |
| <i>recF</i>   |     | 1     | 3         | <i>aceF</i>   |     | 4     | 3.5-4     | <i>vidE</i>   |     | 2     | >4        |
| <i>recG</i>   |     | 1     | 3         | <i>fdx</i>    |     | 4     | 3.5-4     | <i>ynhG</i>   |     | 2     | >4        |
| <i>recJ</i>   |     | 1     | 3         | <i>gpmM</i>   |     | 4     | 3.5-4     | <i>dnaJ</i>   |     | 2A    | >4        |
| <i>recQ</i>   |     | 1     | 3         | <i>hyfF</i>   |     | 4     | 3.5-4     | <i>hlpA</i>   |     | 2A    | >4        |
| <i>recR</i>   |     | 1     | 3         | <i>nuoM</i>   |     | 4     | 3.5-4     | <i>ygeG</i>   |     | 2A    | >4        |
| <i>yfgD</i>   |     | 1A    | 3         | <i>ydbD</i>   |     | 4     | 3.5-4     | <i>fkpB</i>   |     | 3     | >4        |
| <i>acrA</i>   |     | 2     | 3         | <i>ycaN</i>   |     | 5     | 3.5-4     | <i>rplR</i>   |     | 3     | >4        |
| <i>dcuC</i>   |     | 2     | 3         | <i>ydhB</i>   |     | 5     | 3.5-4     | <i>nudB</i>   |     | 4     | >4        |
| <i>dedD</i>   |     | 2     | 3         | <i>yaiU</i>   |     | 7     | 3.5-4     | <i>pnp</i>    |     | 4     | >4        |
| <i>mdtJ</i>   |     | 2     | 3         | <i>ymbA</i>   |     | 7     | 3.5-4     | <i>rpiA</i>   |     | 4     | >4        |
| <i>minC</i>   |     | 2     | 3         | <i>xseB</i>   |     | 1     | 4         | <i>rutA</i>   |     | 4     | >4        |
| <i>qmcA</i>   |     | 2     | 3         | <i>cmk</i>    |     | 1A    | 4         | <i>deaD</i>   |     | 5     | >4        |
| <i>tatC</i>   |     | 2     | 3         | <i>tdK</i>    |     | 1A    | 4         | <i>gcvA</i>   |     | 5     | >4        |
| <i>yehM</i>   |     | 2     | 3         | <i>leuE</i>   |     | 2     | 4         | <i>leuO</i>   |     | 5     | >4        |
| <i>alaS</i>   |     | 3     | 3         | <i>proW</i>   |     | 2     | 4         | <i>zwf</i>    |     | 5     | >4        |
| <i>rimK</i>   |     | 3     | 3         | <i>rfaC</i>   |     | 2     | 4         | <i>JW5115</i> |     | 7     | >4        |
| <i>rplA</i>   |     | 3     | 3         | <i>rfaE</i>   |     | 2     | 4         | <i>ybeY</i>   |     | 7     | >4        |
| <i>sirA</i>   |     | 3     | 3         | <i>rfaG</i>   |     | 2     | 4         | <i>yihG</i>   |     | 7     | >4        |
| <i>amiA</i>   |     | 4     | 3         | <i>rfaP</i>   |     | 2     | 4         | <i>yjgA</i>   |     | 7     | >4        |
| <i>cis</i>    |     | 4     | 3         | <i>ybjJ</i>   |     | 2     | 4         |               |     |       |           |
| <i>iscS</i>   |     | 4     | 3         | <i>ygcO</i>   |     | 2     | 4         |               |     |       |           |
| <i>iscU</i>   |     | 4     | 3         | <i>yheL</i>   |     | 2     | 4         |               |     |       |           |
| <i>mraW</i>   |     | 4     | 3         | <i>dusB</i>   |     | 3     | 4         |               |     |       |           |
| <i>ycjU</i>   |     | 4     | 3         | <i>elaD</i>   |     | 3     | 4         |               |     |       |           |
| <i>ygfZ</i>   |     | 4     | 3         | <i>rpmJ</i>   |     | 3     | 4         |               |     |       |           |
| <i>fur</i>    |     | 5     | 3         | <i>rpsO</i>   |     | 3     | 4         |               |     |       |           |
| <i>hfq</i>    |     | 5     | 3         | <i>ycgF</i>   |     | 3     | 4         |               |     |       |           |
| <i>mfd</i>    |     | 5     | 3         | <i>yfgC</i>   |     | 3     | 4         |               |     |       |           |
| <i>nusB</i>   |     | 5     | 3         | <i>yheM</i>   |     | 3     | 4         |               |     |       |           |
| <i>xapR</i>   |     | 5     | 3         | <i>yheN</i>   |     | 3     | 4         |               |     |       |           |
| <i>JW5169</i> |     | 7     | 3         | <i>atpG</i>   |     | 4     | 4         |               |     |       |           |
| <i>rssA</i>   |     | 7     | 3         | <i>eutM</i>   |     | 4     | 4         |               |     |       |           |
| <i>ybaB</i>   |     | 7     | 3         | <i>fidB</i>   |     | 4     | 4         |               |     |       |           |
| <i>ybjQ</i>   |     | 7     | 3         | <i>rutB</i>   |     | 4     | 4         |               |     |       |           |
| <i>ycbW</i>   |     | 7     | 3         | <i>sucD</i>   |     | 4     | 4         |               |     |       |           |
| <i>yciM</i>   |     | 7     | 3         | <i>treA</i>   |     | 4     | 4         |               |     |       |           |
| <i>ycjG</i>   |     | 7     | 3         | <i>ubiG</i>   |     | 4     | 4         |               |     |       |           |
| <i>cvpA</i>   |     | 2     | 3.5       | <i>ybgC</i>   |     | 4     | 4         |               |     |       |           |
| <i>envC</i>   |     | 2     | 3.5       | <i>yibK</i>   |     | 4     | 4         |               |     |       |           |
| <i>fepC</i>   |     | 2     | 3.5       | <i>yigB</i>   |     | 4     | 4         |               |     |       |           |
| <i>fruB</i>   |     | 2     | 3.5       | <i>dksA</i>   |     | 5     | 4         |               |     |       |           |
| <i>tolC</i>   |     | 2     | 3.5       | <i>flhD</i>   |     | 5     | 4         |               |     |       |           |
| <i>ybgF</i>   |     | 2     | 3.5       | <i>hns</i>    |     | 5     | 4         |               |     |       |           |
| <i>yhdP</i>   |     | 2     | 3.5       | <i>oxyR</i>   |     | 5     | 4         |               |     |       |           |
| <i>yiaD</i>   |     | 2     | 3.5       | <i>yihL</i>   |     | 5     | 4         |               |     |       |           |
| <i>yihL</i>   |     | 2     | 3.5       | <i>ymfT</i>   |     | 6     | 4         |               |     |       |           |
| <i>ymfA</i>   |     | 2     | 3.5       | <i>gfcC</i>   |     | 7     | 4         |               |     |       |           |
| <i>cydB</i>   |     | 4     | 3.5       | <i>JW2207</i> |     | 7     | 4         |               |     |       |           |
| <i>pgaC</i>   |     | 4     | 3.5       | <i>ybdD</i>   |     | 7     | 4         |               |     |       |           |
| <i>ydjI</i>   |     | 4     | 3.5       | <i>dam</i>    |     | 1     | >4        |               |     |       |           |

SUPPLEMENTARY TABLE 4. Metronidazole sensitive strains

| Gene        | MTR | Categ | MIC µg/ml | Gene          | MTR | Categ | MIC µg/ml |
|-------------|-----|-------|-----------|---------------|-----|-------|-----------|
| BW25113     |     |       | 1000      | <i>xseB</i>   |     | 1     | >700      |
| <i>gshA</i> |     | 1A    | 100       | <i>fis</i>    |     | 1A    | >700      |
| <i>uvrD</i> |     | 1     | 300       | <i>tdK</i>    |     | 1A    | >700      |
| <i>recG</i> |     | 1     | 300       | <i>ygfA</i>   |     | 1A    | >700      |
| <i>dinB</i> |     | 1     | 400       | <i>minC</i>   |     | 1A, 2 | >700      |
| <i>ruvA</i> |     | 1     | 400       | <i>acrA</i>   |     | 2     | >700      |
| <i>gshB</i> |     | 1A    | 400       | <i>acrB</i>   |     | 2     | >700      |
| <i>recA</i> |     | 1     | 500       | <i>envC</i>   |     | 2     | >700      |
| <i>recB</i> |     | 1     | 500       | <i>envZ</i>   |     | 2     | >700      |
| <i>recC</i> |     | 1     | 500       | <i>gltl</i>   |     | 2     | >700      |
| <i>uvrA</i> |     | 1     | 500       | <i>lpxM</i>   |     | 2     | >700      |
| <i>uvrC</i> |     | 1     | 500       | <i>plsX</i>   |     | 2     | >700      |
| <i>gor</i>  |     | 1A    | 500       | <i>pstS</i>   |     | 2     | >700      |
| <i>dedD</i> |     | 2     | 500       | <i>tatB</i>   |     | 2     | >700      |
| <i>lpxL</i> |     | 2     | 500       | <i>tolR</i>   |     | 2     | >700      |
| <i>tatC</i> |     | 2     | 500       | <i>typA</i>   |     | 2     | >700      |
| <i>tolC</i> |     | 2     | 500       | <i>rimK</i>   |     | 3     | >700      |
| <i>yciS</i> |     | 2     | 500       | <i>pnp</i>    |     | 3A    | >700      |
| <i>lon</i>  |     | 2A    | 500       | <i>atpG</i>   |     | 4     | >700      |
| <i>amiA</i> |     | 4     | 500       | <i>fabF</i>   |     | 4     | >700      |
| <i>ygfZ</i> |     | 4     | 500       | <i>ycjU</i>   |     | 4     | >700      |
| <i>zwf</i>  |     | 4     | 500       | <i>rpiA</i>   |     | 4     | >700      |
| <i>fur</i>  |     | 5     | 500       | <i>tktA</i>   |     | 4     | >700      |
| <i>hfq</i>  |     | 5     | 500       | <i>ybgC</i>   |     | 4     | >700      |
| <i>mfd</i>  |     | 5     | 500       | <i>ylcG</i>   |     | 6     | >700      |
| <i>nusB</i> |     | 5     | 500       | <i>JW5169</i> |     | 7     | >700      |
| <i>xapR</i> |     | 5     | 500       | <i>ycbW</i>   |     | 7     | >700      |
| <i>rssA</i> |     | 7     | 500       |               |     |       |           |
| <i>yciM</i> |     | 7     | 500       |               |     |       |           |
| <i>yebV</i> |     | 7     | 500       |               |     |       |           |
| <i>dam</i>  |     | 1     | 700       |               |     |       |           |
| <i>recF</i> |     | 1     | 700       |               |     |       |           |
| <i>recO</i> |     | 1     | 700       |               |     |       |           |
| <i>recR</i> |     | 1     | 700       |               |     |       |           |
| <i>yfgD</i> |     | 1A    | 700       |               |     |       |           |
| <i>ppiB</i> |     | 2     | 700       |               |     |       |           |
| <i>rfaC</i> |     | 2     | 700       |               |     |       |           |
| <i>rfaD</i> |     | 2     | 700       |               |     |       |           |
| <i>rfaE</i> |     | 2     | 700       |               |     |       |           |
| <i>rfaG</i> |     | 2     | 700       |               |     |       |           |
| <i>ydcX</i> |     | 2     | 700       |               |     |       |           |
| <i>hlpA</i> |     | 2A    | 700       |               |     |       |           |
| <i>hscA</i> |     | 2A    | 700       |               |     |       |           |
| <i>rplA</i> |     | 3     | 700       |               |     |       |           |
| <i>rppH</i> |     | 3A    | 700       |               |     |       |           |
| <i>gmhB</i> |     | 4     | 700       |               |     |       |           |
| <i>gntY</i> |     | 4     | 700       |               |     |       |           |
| <i>gpmM</i> |     | 4     | 700       |               |     |       |           |
| <i>ydjI</i> |     | 4     | 700       |               |     |       |           |
| <i>ygcO</i> |     | 4     | 700       |               |     |       |           |
| <i>cysB</i> |     | 5     | 700       |               |     |       |           |
| <i>deaD</i> |     | 5     | 700       |               |     |       |           |
| <i>oxyR</i> |     | 5     | 700       |               |     |       |           |
| <i>rseA</i> |     | 5     | 700       |               |     |       |           |
| <i>yciT</i> |     | 5     | 700       |               |     |       |           |
| <i>ybcW</i> |     | 6     | 700       |               |     |       |           |
| <i>ybdN</i> |     | 7     | 700       |               |     |       |           |
| <i>dinG</i> |     | 1     | >700      |               |     |       |           |
| <i>recJ</i> |     | 1     | >700      |               |     |       |           |
| <i>xseA</i> |     | 1     | >700      |               |     |       |           |

SUPPLEMENTARY TABLE 5. Sulfamethoxazole sensitive strains

| Gene        | SFX | Categ | MIC µg/ml |
|-------------|-----|-------|-----------|
| BW25113     |     |       | 1000      |
| <i>recB</i> |     | 1     | 400       |
| <i>recC</i> |     | 1     | 400       |
| <i>nlpC</i> |     | 2     | 400       |
| <i>wbbL</i> |     | 2     | 400       |
| <i>rimK</i> |     | 3     | 400       |
| <i>gpmM</i> |     | 4     | 400       |
| <i>ydbD</i> |     | 4     | 400       |
| <i>fur</i>  |     | 5     | 400       |
| <i>nusB</i> |     | 5     | 400       |
| JW5169      |     | 7     | 400       |
| <i>recG</i> |     | 1     | 500       |
| <i>lpxL</i> |     | 2     | 500       |
| <i>tolC</i> |     | 2     | 500       |
| <i>yciS</i> |     | 2     | 500       |
| <i>degP</i> |     | 2A    | 500       |
| <i>dnaK</i> |     | 2A    | 500       |
| <i>rplA</i> |     | 3     | 500       |
| <i>hyfJ</i> |     | 4     | 500       |
| <i>yciT</i> |     | 5     | 500       |
| JW5115      |     | 7     | 500       |
| <i>ycbW</i> |     | 7     | 500       |
| <i>cpxA</i> |     | 2     | ≤600      |
| <i>ppiB</i> |     | 2     | ≤600      |
| <i>pstA</i> |     | 2     | ≤600      |
| <i>qmcA</i> |     | 2     | ≤600      |
| <i>tatC</i> |     | 2     | ≤600      |
| <i>tolR</i> |     | 2     | ≤600      |
| <i>ycjG</i> |     | 2     | ≤600      |
| <i>yheL</i> |     | 2     | ≤600      |
| <i>yiaD</i> |     | 2     | ≤600      |
| <i>hscA</i> |     | 2A    | ≤600      |
| <i>rpmE</i> |     | 3     | ≤600      |
| <i>rpsO</i> |     | 3     | ≤600      |
| <i>yheM</i> |     | 3     | ≤600      |
| <i>mraW</i> |     | 4     | ≤600      |
| <i>pgaC</i> |     | 4     | ≤600      |
| <i>sucD</i> |     | 4     | ≤600      |
| <i>ycjU</i> |     | 4     | ≤600      |
| <i>yjR</i>  |     | 6     | ≤600      |
| <i>recA</i> |     | 1     | ≥600      |
| <i>fis</i>  |     | 1A    | ≥600      |
| <i>ygfA</i> |     | 1A    | ≥600      |
| <i>rpmF</i> |     | 3     | ≥600      |
| <i>ygcO</i> |     | 4     | ≥600      |
| <i>yddK</i> |     | 7     | ≥600      |
| <i>pstS</i> |     | 2     | 600       |
| <i>rfaC</i> |     | 2     | 600       |
| <i>yheN</i> |     | 3     | 600       |
| <i>atpG</i> |     | 4     | 600       |
| <i>cydB</i> |     | 4     | 600       |
| <i>dapF</i> |     | 4     | 600       |
| <i>iscS</i> |     | 4     | 600       |
| <i>ylcG</i> |     | 6     | 600       |
| <i>ybeY</i> |     | 7     | 600       |
| <i>acrA</i> |     | 2     | >600      |
| <i>rfaE</i> |     | 2     | >600      |
| <i>elaD</i> |     | 3     | >600      |
| <i>rpmJ</i> |     | 3     | >600      |

| Gene        | SFX | Categ | MIC µg/ml |
|-------------|-----|-------|-----------|
| <i>yfgC</i> |     | 3     | >600      |
| <i>dcd</i>  |     | 4     | >600      |
| <i>folB</i> |     | 4     | >600      |
| <i>hfq</i>  |     | 5     | >600      |
| <i>hipB</i> |     | 5     | >600      |
| <i>hns</i>  |     | 5     | >600      |
| <i>leuO</i> |     | 5     | >600      |
| <i>rfaH</i> |     | 5     | >600      |
| <i>rseA</i> |     | 5     | >600      |
| <i>xapR</i> |     | 5     | >600      |
| <i>zapB</i> |     | 5     | >600      |
| <i>yciM</i> |     | 7     | >600      |

SUPPLEMENTARY TABLE 6. Rifampicin sensitive strains

| Gene        | Rif | Categ | MIC µg/ml |
|-------------|-----|-------|-----------|
| BW25113     |     |       | 16        |
| <i>bamB</i> |     | 2     | 1.5       |
| <i>yciM</i> |     | 7     | 1.5       |
| <i>rfaD</i> |     | 2     | 3         |
| <i>rfaE</i> |     | 2     | 3         |
| <i>hlpA</i> |     | 2A    | 3         |
| <i>surA</i> |     | 2A    | 3         |
| <i>rpmF</i> |     | 3     | 3         |
| <i>ylcG</i> |     | 6     | 3         |
| <i>recA</i> |     | 1     | 5         |
| <i>rfaC</i> |     | 2     | 5         |
| <i>tolR</i> |     | 2     | 5         |
| <i>trxA</i> |     | 2     | 5         |
| <i>trxB</i> |     | 2     | 5         |
| <i>yfgC</i> |     | 3     | 5         |
| <i>atpG</i> |     | 4     | 5         |
| <i>gmhB</i> |     | 4     | 5         |
| <i>rpe</i>  |     | 4     | 5         |
| <i>ybgC</i> |     | 4     | 5         |
| <i>hfq</i>  |     | 5     | 5         |
| <i>rseA</i> |     | 5     | 5         |
| <i>ydfH</i> |     | 5     | 5         |
| <i>ybcN</i> |     | 6     | 5         |
| <i>ybeY</i> |     | 7     | 5         |
| <i>rhlB</i> |     | 3A    | 6         |
| <i>uvrA</i> |     | 1     | 7.5       |
| <i>csgG</i> |     | 2     | 7.5       |
| <i>dedD</i> |     | 2     | 7.5       |
| <i>lpxL</i> |     | 2     | 7.5       |
| <i>lpxM</i> |     | 2     | 7.5       |
| <i>pal</i>  |     | 2     | 7.5       |
| <i>rfaG</i> |     | 2     | 7.5       |
| <i>smpA</i> |     | 2     | 7.5       |
| <i>tonB</i> |     | 2     | 7.5       |
| <i>rplA</i> |     | 3     | 7.5       |
| <i>rpmE</i> |     | 3     | 7.5       |
| <i>rpmG</i> |     | 3     | 7.5       |
| <i>nagA</i> |     | 4     | 7.5       |
| <i>pnp</i>  |     | 4     | 7.5       |
| <i>cedA</i> |     | 5     | 7.5       |
| <i>rfaH</i> |     | 5     | 7.5       |
| <i>rssA</i> |     | 7     | 7.5       |
| <i>recB</i> |     | 1     | 8.5       |
| <i>recC</i> |     | 1     | 8.5       |
| <i>recN</i> |     | 1     | 8.5       |
| <i>acrA</i> |     | 2     | 8.5       |
| <i>envC</i> |     | 2     | 8.5       |
| <i>fepB</i> |     | 2     | 8.5       |
| <i>pstA</i> |     | 2     | 8.5       |
| <i>pstS</i> |     | 2     | 8.5       |
| <i>rfaQ</i> |     | 2     | 8.5       |
| <i>tolC</i> |     | 2     | 8.5       |
| <i>dnaK</i> |     | 2A    | 8.5       |
| <i>elaD</i> |     | 3     | 8.5       |
| <i>rimK</i> |     | 3     | 8.5       |
| <i>rpmJ</i> |     | 3     | 8.5       |
| <i>rpsO</i> |     | 3     | 8.5       |
| <i>rbn</i>  |     | 3A    | 8.5       |
| <i>rppH</i> |     | 3A    | 8.5       |
| <i>cis</i>  |     | 4     | 8.5       |

| Gene        | Rif | Categ | MIC µg/ml |
|-------------|-----|-------|-----------|
| <i>cyaA</i> |     | 4     | 8.5       |
| <i>fabF</i> |     | 4     | 8.5       |
| <i>fur</i>  |     | 5     | 8.5       |
| <i>hns</i>  |     | 5     | 8.5       |
| <i>acrB</i> |     | 2     | 10        |
| <i>argO</i> |     | 2     | 10        |
| <i>ecnB</i> |     | 2     | 10        |
| <i>exbD</i> |     | 2     | 10        |
| <i>glcA</i> |     | 2     | 10        |
| <i>phoU</i> |     | 2     | 10        |
| <i>plsX</i> |     | 2     | 10        |
| <i>ppiB</i> |     | 2     | 10        |
| <i>ybjO</i> |     | 2     | 10        |
| <i>yciS</i> |     | 2     | 10        |
| <i>yidE</i> |     | 2     | 10        |
| <i>ycbR</i> |     | 2A    | 10        |
| <i>rsgA</i> |     | 3     | 10        |
| <i>pcnB</i> |     | 3A    | 10        |
| <i>dapF</i> |     | 4     | 10        |
| <i>glpD</i> |     | 4     | 10        |
| <i>gpmM</i> |     | 4     | 10        |
| <i>nuoM</i> |     | 4     | 10        |
| <i>xapR</i> |     | 5     | 10        |
| <i>yciT</i> |     | 5     | 10        |
| <i>gfcC</i> |     | 7     | 10        |
| <i>ybeD</i> |     | 7     | 10        |
| <i>yceD</i> |     | 7     | 10        |
| <i>yehJ</i> |     | 7     | 10        |
| <i>yjgA</i> |     | 7     | 10        |
| <i>yjiW</i> |     | 7     | 10        |
| <i>yjyY</i> |     | 7     | 10        |
| <i>fepC</i> |     | 2     | >10       |

SUPPLEMENTARY TABLE 7. Gentamicin sensitive strains

| Gene        | GEN | Categ | MIC $\mu\text{g/ml}$ |
|-------------|-----|-------|----------------------|
| BW25113     |     |       | 0.8                  |
| <i>recB</i> |     | 1     | 0.5                  |
| <i>envC</i> |     | 2     | 0.5                  |
| <i>ompF</i> |     | 2     | 0.5                  |
| <i>sapC</i> |     | 2     | 0.5                  |
| <i>secG</i> |     | 2     | 0.5                  |
| <i>tatC</i> |     | 2     | 0.5                  |
| <i>tolC</i> |     | 2     | 0.5                  |
| <i>hflK</i> |     | 3     | 0.5                  |
| <i>yheM</i> |     | 3     | 0.5                  |
| <i>yheN</i> |     | 3     | 0.5                  |
| <i>atpG</i> |     | 4     | 0.5                  |
| <i>mraW</i> |     | 4     | 0.5                  |
| <i>nusB</i> |     | 5     | 0.5                  |
| <i>rpoN</i> |     | 5     | 0.5                  |
| <i>xapR</i> |     | 5     | 0.5                  |
| JW5360      |     | 7     | 0.5                  |
| <i>recA</i> |     | 1     | 0.7                  |
| <i>ddlB</i> |     | 2     | 0.7                  |
| <i>yheL</i> |     | 2     | 0.7                  |
| <i>ibpB</i> |     | 2A    | 0.7                  |
| <i>prfC</i> |     | 3     | 0.7                  |
| <i>rpmE</i> |     | 3     | 0.7                  |
| <i>yfgC</i> |     | 3     | 0.7                  |
| <i>dapF</i> |     | 4     | 0.7                  |
| <i>gpmM</i> |     | 4     | 0.7                  |
| <i>iscS</i> |     | 4     | 0.7                  |
| <i>nudB</i> |     | 4     | 0.7                  |
| <i>rutA</i> |     | 4     | 0.7                  |
| <i>yidD</i> |     | 7     | 0.7                  |
| <i>xseB</i> |     | 1     | $\geq 0.7$           |
| <i>gshB</i> |     | 1A    | $\geq 0.7$           |
| <i>acrA</i> |     | 2     | $\geq 0.7$           |
| <i>pstS</i> |     | 2     | $\geq 0.7$           |
| <i>rfaC</i> |     | 2     | $\geq 0.7$           |
| <i>rfaD</i> |     | 2     | $\geq 0.7$           |
| <i>rfaG</i> |     | 2     | $\geq 0.7$           |
| <i>rfaP</i> |     | 2     | $\geq 0.7$           |
| <i>rffA</i> |     | 2     | $\geq 0.7$           |
| <i>smpA</i> |     | 2     | $\geq 0.7$           |
| <i>hlpA</i> |     | 2A    | $\geq 0.7$           |
| <i>rpsO</i> |     | 3     | $\geq 0.7$           |
| <i>rsgA</i> |     | 3     | $\geq 0.7$           |
| <i>rppH</i> |     | 3A    | $\geq 0.7$           |
| <i>cis</i>  |     | 4     | $\geq 0.7$           |
| <i>folB</i> |     | 4     | $\geq 0.7$           |
| <i>glnD</i> |     | 4     | $\geq 0.7$           |
| <i>gmhB</i> |     | 4     | $\geq 0.7$           |
| <i>iscU</i> |     | 4     | $\geq 0.7$           |
| <i>leuO</i> |     | 5     | $\geq 0.7$           |
| <i>mfd</i>  |     | 5     | $\geq 0.7$           |
| <i>pdhR</i> |     | 5     | $\geq 0.7$           |
| <i>yidP</i> |     | 5     | $\geq 0.7$           |
| <i>ybeD</i> |     | 7     | $\geq 0.7$           |
| <i>ybhT</i> |     | 7     | $\geq 0.7$           |
| <i>yciM</i> |     | 7     | $\geq 0.7$           |
| <i>yjgA</i> |     | 7     | $\geq 0.7$           |

SUPPLEMENTARY TABLE 8. Tobramycin sensitive strains

| Gene        | TOB | Categ | MIC µg/ml |
|-------------|-----|-------|-----------|
| BW25113     |     |       | 1         |
| <i>recB</i> |     | 1     | 0.6       |
| <i>envC</i> |     | 2     | 0.6       |
| <i>ompF</i> |     | 2     | 0.6       |
| <i>sapC</i> |     | 2     | 0.6       |
| <i>secG</i> |     | 2     | 0.6       |
| <i>tatC</i> |     | 2     | 0.6       |
| <i>tolC</i> |     | 2     | 0.6       |
| <i>hflK</i> |     | 3     | 0.6       |
| <i>yheM</i> |     | 3     | 0.6       |
| <i>yheN</i> |     | 3     | 0.6       |
| <i>atpG</i> |     | 4     | 0.6       |
| <i>mraW</i> |     | 4     | 0.6       |
| <i>nusB</i> |     | 5     | 0.6       |
| <i>rpoN</i> |     | 5     | 0.6       |
| <i>xapR</i> |     | 5     | 0.6       |
| JW5360      |     | 7     | 0.6       |
| <i>ddlB</i> |     | 2     | 0.7       |
| <i>rfaD</i> |     | 2     | 0.7       |
| <i>rffA</i> |     | 2     | 0.7       |
| <i>yheL</i> |     | 2     | 0.7       |
| <i>hlpA</i> |     | 2A    | 0.7       |
| <i>ibpB</i> |     | 2A    | 0.7       |
| <i>prfC</i> |     | 3     | 0.7       |
| <i>rpmE</i> |     | 3     | 0.7       |
| <i>rpsO</i> |     | 3     | 0.7       |
| <i>yfgC</i> |     | 3     | 0.7       |
| <i>dapF</i> |     | 4     | 0.7       |
| <i>folB</i> |     | 4     | 0.7       |
| <i>glnD</i> |     | 4     | 0.7       |
| <i>gpmM</i> |     | 4     | 0.7       |
| <i>iscS</i> |     | 4     | 0.7       |
| <i>nudB</i> |     | 4     | 0.7       |
| <i>rutA</i> |     | 4     | 0.7       |
| <i>ydjD</i> |     | 7     | 0.7       |
| <i>xseA</i> |     | 1     | 0.8       |
| <i>gshB</i> |     | 1A    | 0.8       |
| <i>acrA</i> |     | 2     | 0.8       |
| <i>cvpA</i> |     | 2     | 0.8       |
| <i>pstA</i> |     | 2     | 0.8       |
| <i>pstS</i> |     | 2     | 0.8       |
| <i>rfaC</i> |     | 2     | 0.8       |
| <i>rfaG</i> |     | 2     | 0.8       |
| <i>rfaP</i> |     | 2     | 0.8       |
| <i>smpA</i> |     | 2     | 0.8       |
| <i>ycjG</i> |     | 2     | 0.8       |
| <i>viaA</i> |     | 2     | 0.8       |
| <i>rplR</i> |     | 3     | 0.8       |
| <i>rsgA</i> |     | 3     | 0.8       |
| <i>tufB</i> |     | 3     | 0.8       |
| <i>rbn</i>  |     | 3A    | 0.8       |
| <i>rppH</i> |     | 3A    | 0.8       |
| <i>acpT</i> |     | 4     | 0.8       |
| <i>cis</i>  |     | 4     | 0.8       |
| <i>gmhB</i> |     | 4     | 0.8       |
| <i>gntK</i> |     | 4     | 0.8       |
| <i>iscU</i> |     | 4     | 0.8       |
| <i>leuO</i> |     | 5     | 0.8       |
| <i>mfd</i>  |     | 5     | 0.8       |
| <i>pdhR</i> |     | 5     | 0.8       |

| Gene        | TOB | Categ | MIC µg/ml |
|-------------|-----|-------|-----------|
| <i>ydjP</i> |     | 5     | 0.8       |
| <i>ybeD</i> |     | 7     | 0.8       |
| <i>ybhT</i> |     | 7     | 0.8       |
| <i>yciM</i> |     | 7     | 0.8       |
| <i>yjgA</i> |     | 7     | 0.8       |
| <i>recA</i> |     | 1     | >0.8      |



SUPPLEMENTARY TABLE 9. Neomycin sensitive strains

| Gene        | NEO | Categ | MIC µg/ml |
|-------------|-----|-------|-----------|
| BW25113     |     |       | 90        |
| <i>recB</i> |     | 1     | <50       |
| <i>envC</i> |     | 2     | <50       |
| <i>lpxM</i> |     | 2     | <50       |
| <i>ompF</i> |     | 2     | <50       |
| <i>tatC</i> |     | 2     | <50       |
| <i>tolC</i> |     | 2     | <50       |
| <i>yfgC</i> |     | 3     | <50       |
| <i>yheN</i> |     | 3     | <50       |
| <i>nudB</i> |     | 4     | <50       |
| <i>nusB</i> |     | 5     | <50       |
| <i>rpoN</i> |     | 5     | <50       |
| <i>rsmF</i> |     | 5     | <50       |
| <i>xapR</i> |     | 5     | <50       |
| <i>xseB</i> |     | 1     | ≤50       |
| <i>ddlB</i> |     | 2     | ≤50       |
| <i>dedD</i> |     | 2     | ≤50       |
| <i>fepC</i> |     | 2     | ≤50       |
| <i>rffA</i> |     | 2     | ≤50       |
| <i>sapC</i> |     | 2     | ≤50       |
| <i>fkpB</i> |     | 2A    | ≤50       |
| <i>hlpA</i> |     | 2A    | ≤50       |
| <i>ibpB</i> |     | 3     | ≤50       |
| <i>prfC</i> |     | 3     | ≤50       |
| <i>dapF</i> |     | 4     | ≤50       |
| <i>folB</i> |     | 4     | ≤50       |
| <i>gntK</i> |     | 4     | ≤50       |
| <i>mraW</i> |     | 4     | ≤50       |
| <i>ydjI</i> |     | 4     | ≤50       |
| <i>leuO</i> |     | 5     | ≤50       |
| <i>mfd</i>  |     | 5     | ≤50       |
| <i>yciM</i> |     | 7     | ≤50       |
| <i>yidD</i> |     | 7     | ≤50       |
| <i>yjgA</i> |     | 7     | ≤50       |
| <i>dinG</i> |     | 1     | ≥50       |
| <i>gshB</i> |     | 1A    | ≥50       |
| <i>ftsP</i> |     | 1A    | ≥50       |
| <i>acrA</i> |     | 2     | ≥50       |
| <i>cvpA</i> |     | 2     | ≥50       |
| <i>fepB</i> |     | 2     | ≥50       |
| <i>fruB</i> |     | 2     | ≥50       |
| <i>nlpC</i> |     | 2     | ≥50       |
| <i>ppiB</i> |     | 2     | ≥50       |
| <i>rfaC</i> |     | 2     | ≥50       |
| <i>rfaD</i> |     | 2     | ≥50       |
| <i>rfaG</i> |     | 2     | ≥50       |
| <i>rfaP</i> |     | 2     | ≥50       |
| <i>smpA</i> |     | 2     | ≥50       |
| <i>tolQ</i> |     | 2     | ≥50       |
| <i>wbbL</i> |     | 2     | ≥50       |
| <i>yehM</i> |     | 2     | ≥50       |
| <i>ycjG</i> |     | 2     | ≥50       |
| <i>yhdP</i> |     | 2     | ≥50       |
| <i>viaA</i> |     | 2     | ≥50       |
| <i>ymfA</i> |     | 2     | ≥50       |
| <i>yneE</i> |     | 2     | ≥50       |
| <i>rplR</i> |     | 3     | ≥50       |
| <i>yheM</i> |     | 3     | ≥50       |
| <i>rppH</i> |     | 3A    | ≥50       |
| <i>ackA</i> |     | 4     | ≥50       |

| Gene          | NEO | Categ | MIC µg/ml |
|---------------|-----|-------|-----------|
| <i>acpT</i>   |     | 4     | ≥50       |
| <i>atpG</i>   |     | 4     | ≥50       |
| <i>cis</i>    |     | 4     | ≥50       |
| <i>glnD</i>   |     | 4     | ≥50       |
| <i>gmhB</i>   |     | 4     | ≥50       |
| <i>gpmM</i>   |     | 4     | ≥50       |
| <i>nuoM</i>   |     | 4     | ≥50       |
| <i>pgaC</i>   |     | 4     | ≥50       |
| <i>dkxA</i>   |     | 5     | ≥50       |
| <i>slyA</i>   |     | 5     | ≥50       |
| <i>yciT</i>   |     | 5     | ≥50       |
| <i>yidP</i>   |     | 5     | ≥50       |
| <i>JW5169</i> |     | 7     | ≥50       |
| <i>JW5360</i> |     | 7     | ≥50       |
| <i>ybhT</i>   |     | 7     | ≥50       |

SUPPLEMENTARY TABLE 10. Streptomycin sensitive strains

| Gene        | STR | Categ | MIC $\mu\text{g/ml}$ |
|-------------|-----|-------|----------------------|
| BW25113     |     |       | 3.5                  |
| <i>atpG</i> |     | 4     | $\leq 2.5$           |
| <i>dapF</i> |     | 4     | $\leq 2.5$           |
| <i>envC</i> |     | 2     | 2.5                  |
| <i>rfaD</i> |     | 2     | 2.5                  |
| <i>tatC</i> |     | 2     | 2.5                  |
| <i>tolC</i> |     | 2     | 2.5                  |
| <i>yheN</i> |     | 3     | 2.5                  |
| <i>xapR</i> |     | 5     | 2.5                  |
| <i>recC</i> |     | 1     | $\geq 2.5$           |
| <i>acrA</i> |     | 2     | $\geq 2.5$           |
| <i>ddlB</i> |     | 2     | $\geq 2.5$           |
| <i>ompF</i> |     | 2     | $\geq 2.5$           |
| <i>rfaE</i> |     | 2     | $\geq 2.5$           |
| <i>sapC</i> |     | 2     | $\geq 2.5$           |
| <i>secG</i> |     | 2     | $\geq 2.5$           |
| <i>prfC</i> |     | 3     | $\geq 2.5$           |
| <i>yfgC</i> |     | 3     | $\geq 2.5$           |
| <i>gmhB</i> |     | 4     | $\geq 2.5$           |
| <i>mraW</i> |     | 4     | $\geq 2.5$           |
| <i>rutA</i> |     | 4     | $\geq 2.5$           |
| <i>leuO</i> |     | 5     | $\geq 2.5$           |
| <i>recA</i> |     | 1     | $> 2.5$              |
| <i>fepC</i> |     | 2     | $> 2.5$              |
| <i>proW</i> |     | 2     | $> 2.5$              |
| <i>ibpB</i> |     | 2A    | $> 2.5$              |
| <i>folB</i> |     | 4     | $> 2.5$              |
| <i>gpmM</i> |     | 4     | $> 2.5$              |
| <i>mfd</i>  |     | 5     | $> 2.5$              |
| <i>yidP</i> |     | 5     | $> 2.5$              |
| <i>yidD</i> |     | 7     | $> 2.5$              |

SUPPLEMENTARY TABLE 11. Spectinomycin sensitive strains

| Gene        | SPT | Categ | MIC $\mu\text{g/ml}$ |
|-------------|-----|-------|----------------------|
| BW25113     |     |       | 20                   |
| <i>tolC</i> |     | 2     | 13.5                 |
| <i>dnaK</i> |     | 2A    | 13.5                 |
| <i>rplA</i> |     | 3     | 13.5                 |
| <i>rpmJ</i> |     | 3     | 13.5                 |
| <i>atpG</i> |     | 4     | 13.5                 |
| <i>pnp</i>  |     | 4     | 13.5                 |
| <i>hns</i>  |     | 5     | 13.5                 |
| <i>ybeY</i> |     | 7     | 13.5                 |
| <i>yciM</i> |     | 7     | 13.5                 |
| <i>recB</i> |     | 1     | 15                   |
| <i>lpxL</i> |     | 2     | 15                   |
| <i>rfaD</i> |     | 2     | 15                   |
| <i>sapC</i> |     | 2     | 15                   |
| <i>rpmE</i> |     | 3     | 15                   |
| <i>yheN</i> |     | 3     | 15                   |
| <i>dapF</i> |     | 4     | 15                   |
| <i>rpe</i>  |     | 4     | 15                   |
| <i>oxyR</i> |     | 5     | 15                   |
| <i>recA</i> |     | 1     | >15                  |
| <i>recC</i> |     | 1     | >15                  |
| <i>hrpA</i> |     | 1A    | >15                  |
| <i>acrA</i> |     | 2     | >15                  |
| <i>ppiB</i> |     | 2     | >15                  |
| <i>proW</i> |     | 2     | >15                  |
| <i>rfaC</i> |     | 2     | >15                  |
| <i>rfaE</i> |     | 2     | >15                  |
| <i>surA</i> |     | 2A    | >15                  |
| <i>mnmG</i> |     | 3     | >15                  |
| <i>yheM</i> |     | 3     | >15                  |
| <i>iscS</i> |     | 4     | >15                  |
| <i>tktA</i> |     | 4     | >15                  |
| <i>ygcO</i> |     | 4     | >15                  |
| <i>dksA</i> |     | 5     | >15                  |
| <i>rpoN</i> |     | 5     | >15                  |
| <i>rseA</i> |     | 5     | >15                  |
| <i>yciT</i> |     | 5     | >15                  |

SUPPLEMENTARY TABLE 12. Tetracycline sensitive strains

| Gene        | TET | Categ | MIC µg/ml |
|-------------|-----|-------|-----------|
| BW25113     |     |       | 2.5       |
| <i>acrA</i> |     | 2     | 0.5       |
| <i>tolC</i> |     | 2     | 0.5       |
| <i>acrB</i> |     | 2     | 1         |
| <i>dedD</i> |     | 2     | 1         |
| <i>nlpC</i> |     | 2     | 1         |
| <i>ybaB</i> |     | 2     | 1         |
| <i>rimK</i> |     | 3     | 1         |
| <i>ygcO</i> |     | 4     | 1         |
| <i>dksA</i> |     | 5     | 1         |
| <i>hns</i>  |     | 5     | 1         |
| <i>nusB</i> |     | 5     | 1         |
| <i>yciM</i> |     | 7     | 1         |
| <i>recB</i> |     | 1     | 1-1.5     |
| <i>envC</i> |     | 2     | 1-1.5     |
| <i>gpmM</i> |     | 2     | 1-1.5     |
| <i>pgmP</i> |     | 2     | 1-1.5     |
| <i>ppiD</i> |     | 2     | 1-1.5     |
| <i>proW</i> |     | 2     | 1-1.5     |
| <i>ycdZ</i> |     | 2     | 1-1.5     |
| <i>rplA</i> |     | 3     | 1-1.5     |
| <i>ybgF</i> |     | 3     | 1-1.5     |
| <i>iscS</i> |     | 4     | 1-1.5     |
| <i>ycjU</i> |     | 4     | 1-1.5     |
| <i>hfq</i>  |     | 5     | 1-1.5     |
| <i>oxyR</i> |     | 5     | 1-1.5     |
| <i>phoP</i> |     | 5     | 1-1.5     |
| <i>yciT</i> |     | 5     | 1-1.5     |
| <i>qmcA</i> |     | 7     | 1-1.5     |
| <i>ydcS</i> |     | 7     | 1-1.5     |
| <i>recA</i> |     | 1     | ≥1.5      |
| <i>recC</i> |     | 1     | ≥1.5      |
| <i>csgG</i> |     | 2     | ≥1.5      |
| <i>lpxM</i> |     | 2     | ≥1.5      |
| <i>pstA</i> |     | 2     | ≥1.5      |
| <i>pstS</i> |     | 2     | ≥1.5      |
| <i>qmcA</i> |     | 2     | ≥1.5      |
| <i>rfaQ</i> |     | 2     | ≥1.5      |
| <i>surA</i> |     | 2     | ≥1.5      |
| <i>tonB</i> |     | 2     | ≥1.5      |
| <i>yehM</i> |     | 2     | ≥1.5      |
| <i>ydcX</i> |     | 2     | ≥1.5      |
| <i>dnaK</i> |     | 2A    | ≥1.5      |
| <i>hscA</i> |     | 2A    | ≥1.5      |
| <i>rpmJ</i> |     | 3     | ≥1.5      |
| <i>rpsF</i> |     | 3     | ≥1.5      |
| <i>rrmJ</i> |     | 3     | ≥1.5      |
| <i>yfgC</i> |     | 3     | ≥1.5      |
| <i>yheN</i> |     | 3     | ≥1.5      |
| <i>amiA</i> |     | 4     | ≥1.5      |
| <i>cysB</i> |     | 4     | ≥1.5      |
| <i>dcd</i>  |     | 4     | ≥1.5      |
| <i>rpe</i>  |     | 4     | ≥1.5      |
| <i>ihfA</i> |     | 5     | ≥1.5      |
| <i>rseA</i> |     | 5     | ≥1.5      |
| <i>vacJ</i> |     | 5     | ≥1.5      |
| <i>zapB</i> |     | 5     | ≥1.5      |
| <i>yneE</i> |     | 6     | ≥1.5      |
| <i>ybeY</i> |     | 7     | ≥1.5      |
| <i>yceD</i> |     | 7     | ≥1.5      |
| <i>yjjY</i> |     | 7     | ≥1.5      |

SUPPLEMENTARY TABLE 13. Vancomycin sensitive strains

| Gene        | VAN | Categ | MIC µg/ml |
|-------------|-----|-------|-----------|
| BW25113     |     |       | 500       |
| <i>surA</i> |     | 2A    | 4         |
| <i>smpA</i> |     | 2     | 70        |
| <i>bamB</i> |     | 2     | 100       |
| <i>envC</i> |     | 2     | 100       |
| <i>lpxL</i> |     | 2     | 100       |
| <i>tatC</i> |     | 2     | 100       |
| <i>tolR</i> |     | 2     | 100       |
| <i>ydcS</i> |     | 2     | 100       |
| <i>yciM</i> |     | 7     | 100       |
| <i>recA</i> |     | 1     | 150       |
| <i>envZ</i> |     | 2     | 150       |
| <i>lpxM</i> |     | 2     | 150       |
| <i>nlpC</i> |     | 2     | 150       |
| <i>pal</i>  |     | 2     | 150       |
| <i>proW</i> |     | 2     | 150       |
| <i>rfaC</i> |     | 2     | 150       |
| <i>ybgF</i> |     | 2     | 150       |
| <i>yhdP</i> |     | 2     | 150       |
| <i>dnaK</i> |     | 2A    | 150       |
| <i>hlpA</i> |     | 2A    | 150       |
| <i>hscA</i> |     | 2A    | 150       |
| <i>hscB</i> |     | 2A    | 150       |
| <i>rimK</i> |     | 3     | 150       |
| <i>rplA</i> |     | 3     | 150       |
| <i>tufA</i> |     | 3     | 150       |
| <i>yfgC</i> |     | 3     | 150       |
| <i>aceE</i> |     | 4     | 150       |
| <i>pgaC</i> |     | 4     | 150       |
| <i>ycjU</i> |     | 4     | 150       |
| <i>ygcO</i> |     | 4     | 150       |
| <i>dksA</i> |     | 5     | 150       |
| <i>fur</i>  |     | 5     | 150       |
| <i>rsmF</i> |     | 5     | 150       |
| <i>xapR</i> |     | 5     | 150       |
| <i>yciT</i> |     | 5     | 150       |
| <i>ylcG</i> |     | 6     | 150       |
| <i>ydhT</i> |     | 7     | 150       |
| <i>recB</i> |     | 1     | >150      |
| <i>ftsP</i> |     | 1A    | >150      |
| <i>fepC</i> |     | 2     | >150      |
| <i>qmcA</i> |     | 2     | >150      |
| <i>tatB</i> |     | 2     | >150      |
| <i>tonB</i> |     | 2     | >150      |
| <i>yheL</i> |     | 2     | >150      |
| <i>elaD</i> |     | 3     | >150      |
| <i>rpmJ</i> |     | 3     | >150      |
| <i>rpsO</i> |     | 3     | >150      |
| <i>rrmJ</i> |     | 3     | >150      |
| <i>yheM</i> |     | 3     | >150      |
| <i>yheN</i> |     | 3     | >150      |
| <i>rppH</i> |     | 3A    | >150      |
| <i>cis</i>  |     | 4     | >150      |
| <i>cydB</i> |     | 4     | >150      |
| <i>fdx</i>  |     | 4     | >150      |
| <i>yijC</i> |     | 4     | >150      |
| <i>gpmM</i> |     | 4     | >150      |
| <i>iscS</i> |     | 4     | >150      |
| <i>hns</i>  |     | 5     | >150      |
| <i>ybgT</i> |     | 7     | >150      |
| <i>yjjY</i> |     | 7     | >150      |

SUPPLEMENTARY TABLE 14. Ampicillin sensitive strains

| Gene          | AMP | Categ | MIC µg/ml |
|---------------|-----|-------|-----------|
| BW25113       |     |       | 6         |
| <i>acrA</i>   |     | 2     | 1         |
| <i>dacA</i>   |     | 2     | 1         |
| <i>ddlB</i>   |     | 2     | 1         |
| <i>dedD</i>   |     | 2     | 1         |
| <i>emtA</i>   |     | 2     | 1         |
| <i>mrcB</i>   |     | 2     | 1         |
| <i>tolC</i>   |     | 2     | 1         |
| <i>ybgF</i>   |     | 2     | 1         |
| <i>surA</i>   |     | 2A    | 1         |
| <i>rimK</i>   |     | 3     | 1         |
| <i>rplA</i>   |     | 3     | 1         |
| <i>rpmF</i>   |     | 3     | 1         |
| <i>rrmJ</i>   |     | 3     | 1         |
| <i>yfgC</i>   |     | 3     | 1         |
| <i>dapF</i>   |     | 4     | 1         |
| <i>ycjU</i>   |     | 4     | 1         |
| <i>ygcO</i>   |     | 4     | 1         |
| <i>yciT</i>   |     | 5     | 1         |
| <i>ylcG</i>   |     | 6     | 1         |
| <i>JW5115</i> |     | 7     | 1         |
| <i>JW5169</i> |     | 7     | 1         |
| <i>yciM</i>   |     | 7     | 1         |
| <i>yfiH</i>   |     | 7     | 1         |
| <i>recA</i>   |     | 1     | 1.5       |
| <i>ftsP</i>   |     | 1A    | 1.5       |
| <i>acrB</i>   |     | 2     | 1.5       |
| <i>bamB</i>   |     | 2     | 1.5       |
| <i>envC</i>   |     | 2     | 1.5       |
| <i>nlpC</i>   |     | 2     | 1.5       |
| <i>qmcA</i>   |     | 2     | 1.5       |
| <i>tatB</i>   |     | 2     | 1.5       |
| <i>tatC</i>   |     | 2     | 1.5       |
| <i>tolR</i>   |     | 2     | 1.5       |
| <i>ydcS</i>   |     | 2     | 1.5       |
| <i>fkpB</i>   |     | 2A    | 1.5       |
| <i>hlpA</i>   |     | 2A    | 1.5       |
| <i>hscA</i>   |     | 2A    | 1.5       |
| <i>hscB</i>   |     | 2A    | 1.5       |
| <i>rsgA</i>   |     | 3     | 1.5       |
| <i>ydgD</i>   |     | 3     | 1.5       |
| <i>atpG</i>   |     | 4     | 1.5       |
| <i>gpmM</i>   |     | 4     | 1.5       |
| <i>pgaC</i>   |     | 4     | 1.5       |
| <i>ubiG</i>   |     | 4     | 1.5       |
| <i>dksA</i>   |     | 5     | 1.5       |
| <i>hfq</i>    |     | 5     | 1.5       |
| <i>mfd</i>    |     | 5     | 1.5       |
| <i>nusB</i>   |     | 5     | 1.5       |
| <i>phoP</i>   |     | 5     | 1.5       |
| <i>rlmH</i>   |     | 5     | 1.5       |
| <i>rsmF</i>   |     | 5     | 1.5       |
| <i>xapR</i>   |     | 5     | 1.5       |
| <i>ydhB</i>   |     | 5     | 1.5       |
| <i>zapB</i>   |     | 5     | 1.5       |
| <i>ybcW</i>   |     | 6     | 1.5       |
| <i>rssA</i>   |     | 7     | 1.5       |
| <i>ybaB</i>   |     | 7     | 1.5       |
| <i>ybeD</i>   |     | 7     | 1.5       |

| Gene        | AMP | Categ | MIC µg/ml |
|-------------|-----|-------|-----------|
| <i>ybeY</i> |     | 7     | 1.5       |
| <i>ybhT</i> |     | 7     | 1.5       |
| <i>ycbK</i> |     | 7     | 1.5       |
| <i>yceD</i> |     | 7     | 1.5       |
| <i>yddK</i> |     | 7     | 1.5       |
| <i>yebV</i> |     | 7     | 1.5       |
| <i>yjjY</i> |     | 7     | 1.5       |
| <i>dam</i>  |     | 1     | >1.5      |
| <i>xerC</i> |     | 1     | >1.5      |
| <i>yfgD</i> |     | 1A    | >1.5      |
| <i>gltI</i> |     | 2     | >1.5      |
| <i>pal</i>  |     | 2     | >1.5      |
| <i>tolQ</i> |     | 2     | >1.5      |
| <i>tonB</i> |     | 2     | >1.5      |
| <i>wbbL</i> |     | 2     | >1.5      |
| <i>ybfB</i> |     | 2     | >1.5      |
| <i>ybjJ</i> |     | 2     | >1.5      |
| <i>ycjG</i> |     | 2     | >1.5      |
| <i>rpmJ</i> |     | 3     | >1.5      |
| <i>atpG</i> |     | 4     | >1.5      |
| <i>cof</i>  |     | 4     | >1.5      |
| <i>dcd</i>  |     | 4     | >1.5      |
| <i>iscS</i> |     | 4     | >1.5      |
| <i>iscU</i> |     | 4     | >1.5      |
| <i>lpdA</i> |     | 4     | >1.5      |
| <i>rpiA</i> |     | 4     | >1.5      |
| <i>rutA</i> |     | 4     | >1.5      |
| <i>sucD</i> |     | 4     | >1.5      |
| <i>ycgF</i> |     | 4     | >1.5      |
| <i>ygfZ</i> |     | 4     | >1.5      |
| <i>ybjQ</i> |     | 7     | >1.5      |
| <i>ycbW</i> |     | 7     | >1.5      |
| <i>yehJ</i> |     | 7     | >1.5      |
| <i>ydhT</i> |     | 7     | >1.5      |
| <i>yjgA</i> |     | 7     | >1.5      |

SUPPLEMENTARY TABLE 15. Cephadrine sensitive strains

| Gene          | RAD | Categ | MIC µg/ml | Gene          | RAD | Categ | MIC µg/ml |
|---------------|-----|-------|-----------|---------------|-----|-------|-----------|
| BW25113       |     |       | 15        | <i>gpmM</i>   |     | 4     | 9.5       |
| <i>recA</i>   |     | 1     | 8         | <i>iscU</i>   |     | 4     | 9..5      |
| <i>xerC</i>   |     | 1     | 8         | <i>rutA</i>   |     | 4     | 9.5       |
| <i>acrA</i>   |     | 2     | 8         | <i>sucD</i>   |     | 4     | 9.5       |
| <i>dacA</i>   |     | 2     | 8         | <i>dksA</i>   |     | 5     | 9.5       |
| <i>mrcB</i>   |     | 2     | 8         | <i>flhD</i>   |     | 5     | 9.5       |
| <i>ddlB</i>   |     | 2     | 8         | <i>ihfA</i>   |     | 5     | 9.5       |
| <i>emtA</i>   |     | 2     | 8         | <i>mfd</i>    |     | 5     | 9.5       |
| <i>nlpC</i>   |     | 2     | 8         | <i>rsmF</i>   |     | 5     | 9.5       |
| <i>plsX</i>   |     | 2     | 8         | <i>JW5169</i> |     | 7     | 9.5       |
| <i>hscA</i>   |     | 2A    | 8         | <i>ybaB</i>   |     | 7     | 9.5       |
| <i>rimK</i>   |     | 3     | 8         | <i>ybgT</i>   |     | 7     | 9.5       |
| <i>rplA</i>   |     | 3     | 8         | <i>ybhT</i>   |     | 7     | 9.5       |
| <i>rpmF</i>   |     | 3     | 8         | <i>yceD</i>   |     | 7     | 9.5       |
| <i>rrmJ</i>   |     | 3     | 8         | <i>ycdZ</i>   |     | 2     | 10        |
| <i>dapF</i>   |     | 4     | 8         |               |     |       |           |
| <i>fabF</i>   |     | 4     | 8         |               |     |       |           |
| <i>lpdA</i>   |     | 4     | 8         |               |     |       |           |
| <i>ygcO</i>   |     | 4     | 8         |               |     |       |           |
| <i>zwf</i>    |     | 4     | 8         |               |     |       |           |
| <i>nusB</i>   |     | 5     | 8         |               |     |       |           |
| <i>rpoN</i>   |     | 5     | 8         |               |     |       |           |
| <i>ycbK</i>   |     | 7     | 8         |               |     |       |           |
| <i>yciM</i>   |     | 7     | 8         |               |     |       |           |
| <i>yfiH</i>   |     | 7     | 8         |               |     |       |           |
| <i>ybjJ</i>   |     | 2     | 8.5       |               |     |       |           |
| <i>rsgA</i>   |     | 3     | 8.5       |               |     |       |           |
| <i>ycjU</i>   |     | 4     | 8.5       |               |     |       |           |
| <i>yciT</i>   |     | 5     | 8.5       |               |     |       |           |
| <i>tolC</i>   |     | 2     | 9         |               |     |       |           |
| <i>surA</i>   |     | 2A    | 9         |               |     |       |           |
| <i>rpsO</i>   |     | 3     | 9         |               |     |       |           |
| <i>cydB</i>   |     | 4     | 9         |               |     |       |           |
| <i>iscS</i>   |     | 4     | 9         |               |     |       |           |
| <i>pgaC</i>   |     | 4     | 9         |               |     |       |           |
| <i>ubiG</i>   |     | 4     | 9         |               |     |       |           |
| <i>ygfZ</i>   |     | 4     | 9         |               |     |       |           |
| <i>hfq</i>    |     | 5     | 9         |               |     |       |           |
| <i>phoP</i>   |     | 5     | 9         |               |     |       |           |
| <i>rlmH</i>   |     | 5     | 9         |               |     |       |           |
| <i>zapB</i>   |     | 5     | 9         |               |     |       |           |
| <i>ybeD</i>   |     | 7     | 9         |               |     |       |           |
| <i>ybeY</i>   |     | 7     | 9         |               |     |       |           |
| <i>JW5474</i> |     | 7     | 9         |               |     |       |           |
| <i>dam</i>    |     | 1     | 9.5       |               |     |       |           |
| <i>recB</i>   |     | 1     | 9.5       |               |     |       |           |
| <i>gor</i>    |     | 1A    | 9.5       |               |     |       |           |
| <i>yfgD</i>   |     | 1A    | 9.5       |               |     |       |           |
| <i>acrB</i>   |     | 2     | 9.5       |               |     |       |           |
| <i>flgF</i>   |     | 2     | 9.5       |               |     |       |           |
| <i>lpxL</i>   |     | 2     | 9.5       |               |     |       |           |
| <i>qmcA</i>   |     | 2     | 9.5       |               |     |       |           |
| <i>ycjG</i>   |     | 2     | 9.5       |               |     |       |           |
| <i>yheL</i>   |     | 2     | 9.5       |               |     |       |           |
| <i>sirA</i>   |     | 3     | 9.5       |               |     |       |           |
| <i>ydgD</i>   |     | 3     | 9.5       |               |     |       |           |
| <i>yfgC</i>   |     | 3     | 9.5       |               |     |       |           |
| <i>yheM</i>   |     | 3     | 9.5       |               |     |       |           |
| <i>yheN</i>   |     | 3     | 9.5       |               |     |       |           |
| <i>glnD</i>   |     | 4     | 9.5       |               |     |       |           |

SUPPLEMENTARY TABLE 16. Cefoxitin sensitive strains

| Gene        | FOX | Categ | MIC $\mu\text{g/ml}$ |
|-------------|-----|-------|----------------------|
| BW25113     |     |       | 8                    |
| <i>acrA</i> |     | 2     | 2                    |
| <i>acrB</i> |     | 2     | 2                    |
| <i>tolC</i> |     | 2     | 2                    |
| <i>dacA</i> |     | 2     | 2                    |
| <i>mrcB</i> |     | 2     | 2                    |
| <i>qmcA</i> |     | 2     | 2                    |
| <i>ybgF</i> |     | 2     | 2                    |
| <i>ydcS</i> |     | 2     | 2                    |
| <i>rimK</i> |     | 3     | 2                    |
| <i>rplA</i> |     | 3     | 2                    |
| <i>rsgA</i> |     | 3     | 2                    |
| <i>dapF</i> |     | 4     | 2                    |
| <i>ycjU</i> |     | 4     | 2                    |
| <i>ygcO</i> |     | 4     | 2                    |
| <i>dksA</i> |     | 5     | 2                    |
| <i>yciT</i> |     | 5     | 2                    |
| <i>yceK</i> |     | 2     | $\geq 2$             |
| <i>ydcX</i> |     | 2     | $\geq 2$             |
| <i>rpmF</i> |     | 3     | $\geq 2$             |
| <i>dcd</i>  |     | 4     | $\geq 2$             |
| <i>hyfJ</i> |     | 4     | $\geq 2$             |
| <i>iscS</i> |     | 4     | $\geq 2$             |
| <i>rssA</i> |     | 7     | $\geq 2$             |
| <i>ybhT</i> |     | 7     | $\geq 2$             |
| <i>ychJ</i> |     | 7     | $\geq 2$             |
| <i>yciM</i> |     | 7     | $\geq 2$             |
| <i>yfiH</i> |     | 7     | $\geq 2$             |
| <i>yjjY</i> |     | 7     | $\geq 2$             |
| <i>flgF</i> |     | 2     | $> 2$                |
| <i>hscA</i> |     | 2A    | $> 2$                |
| <i>rrmJ</i> |     | 3     | $> 2$                |
| <i>sirA</i> |     | 3     | $> 2$                |
| <i>yheM</i> |     | 3     | $> 2$                |
| <i>yheN</i> |     | 3     | $> 2$                |
| <i>aceE</i> |     | 4     | $> 2$                |
| <i>aceF</i> |     | 4     | $> 2$                |
| <i>cydB</i> |     | 4     | $> 2$                |
| <i>lpdA</i> |     | 4     | $> 2$                |
| <i>pgaC</i> |     | 4     | $> 2$                |
| <i>ptA</i>  |     | 4     | $> 2$                |
| <i>rplA</i> |     | 4     | $> 2$                |
| <i>yglZ</i> |     | 4     | $> 2$                |
| <i>nusB</i> |     | 5     | $> 2$                |
| <i>phoP</i> |     | 5     | $> 2$                |
| <i>rpoN</i> |     | 5     | $> 2$                |
| <i>rsmF</i> |     | 5     | $> 2$                |
| <i>ybaB</i> |     | 7     | $> 2$                |
| <i>ybgT</i> |     | 7     | $> 2$                |
| <i>ycbK</i> |     | 7     | $> 2$                |
| <i>yebV</i> |     | 7     | $> 2$                |
| <i>recA</i> |     | 1     | 3                    |
| <i>recB</i> |     | 1     | 3                    |
| <i>ddlB</i> |     | 2     | 3                    |
| <i>emtA</i> |     | 2     | 3                    |
| <i>plsX</i> |     | 2     | 3                    |
| <i>proW</i> |     | 2     | 3                    |
| <i>tatC</i> |     | 2     | 3                    |
| <i>cof</i>  |     | 4     | 3                    |
| <i>gpmM</i> |     | 4     | 3                    |



SUPPLEMENTARY TABLE 17. Aztreonam sensitive strains

| Gene        | ATM | Categ | MIC ng/ml |
|-------------|-----|-------|-----------|
| BW25113     |     |       | 100       |
| <i>rimK</i> |     | 3     | 10        |
| <i>rplA</i> |     | 3     | 10        |
| <i>ygcO</i> |     | 4     | 10        |
| <i>dedD</i> |     | 2     | 15        |
| <i>nlpC</i> |     | 2     | 15        |
| <i>tatC</i> |     | 2     | 15        |
| <i>ybgF</i> |     | 2     | 15        |
| <i>surA</i> |     | 2A    | 15        |
| <i>alaS</i> |     | 3     | 15        |
| <i>aceF</i> |     | 4     | 15        |
| <i>dapF</i> |     | 4     | 15        |
| <i>pgaC</i> |     | 4     | 15        |
| <i>ycjU</i> |     | 4     | 15        |
| <i>nusB</i> |     | 5     | 15        |
| <i>yciT</i> |     | 5     | 15        |
| <i>yciM</i> |     | 7     | 15        |
| <i>dam</i>  |     | 1     | ≤15       |
| <i>plsX</i> |     | 2     | ≤15       |
| <i>proW</i> |     | 2     | ≤15       |
| <i>qmcA</i> |     | 2     | ≤15       |
| <i>ybjJ</i> |     | 2     | ≤15       |
| <i>ydcS</i> |     | 2     | ≤15       |
| <i>hlpA</i> |     | 2A    | ≤15       |
| <i>hscA</i> |     | 2A    | ≤15       |
| <i>rsgA</i> |     | 3     | ≤15       |
| <i>fdx</i>  |     | 4     | ≤15       |
| <i>dksA</i> |     | 5     | ≤15       |
| <i>rsmF</i> |     | 5     | ≤15       |
| <i>ybcW</i> |     | 6     | ≤15       |
| <i>ymfT</i> |     | 6     | ≤15       |
| JW5169      |     | 7     | ≤15       |
| <i>yehJ</i> |     | 7     | ≤15       |
| <i>yjjY</i> |     | 7     | ≤15       |
| <i>dacA</i> |     | 2     | >15       |
| <i>envC</i> |     | 2     | >15       |
| <i>yceK</i> |     | 2     | >15       |
| <i>hscB</i> |     | 2A    | >15       |
| <i>rrmJ</i> |     | 3     | >15       |
| <i>yfgC</i> |     | 3     | >15       |
| <i>cof</i>  |     | 4     | >15       |
| <i>gpmM</i> |     | 4     | >15       |
| <i>iscS</i> |     | 4     | >15       |
| <i>rpiA</i> |     | 4     | >15       |
| <i>ihfA</i> |     | 5     | >15       |
| <i>ydhT</i> |     | 7     | >15       |

SUPPLEMENTARY TABLE 18. Colistin sensitive strains

| Gene        | CST | Categ | MIC ng/ml |
|-------------|-----|-------|-----------|
| BW25113     |     |       | 250       |
| <i>rfaD</i> |     | 2     | 100       |
| <i>rfaG</i> |     | 2     | 100       |
| <i>surA</i> |     | 2A    | 130       |
| <i>rfaC</i> |     | 2     | 150       |
| <i>atpG</i> |     | 4     | 150       |
| <i>gmhB</i> |     | 4     | 150       |
| <i>rfaE</i> |     | 2     | 160       |
| <i>yheN</i> |     | 3     | 160       |
| <i>lpxL</i> |     | 2     | 170       |
| <i>recA</i> |     | 1     | 175       |
| <i>envC</i> |     | 2     | 175       |
| <i>rplA</i> |     | 3     | 175       |
| <i>rfaH</i> |     | 5     | 175       |
| <i>yciM</i> |     | 7     | 175       |
| <i>ppiB</i> |     | 2     | 185       |
| <i>tatC</i> |     | 2     | 185       |
| <i>tolC</i> |     | 2     | 185       |
| <i>hlpA</i> |     | 2A    | 185       |
| <i>rpmE</i> |     | 3     | 185       |
| <i>cysB</i> |     | 5     | 185       |
| <i>nusB</i> |     | 5     | 185       |
| <i>rpoN</i> |     | 5     | 185       |
| <i>dcuC</i> |     | 2     | 200       |
| <i>rpmF</i> |     | 3     | 200       |
| <i>dapF</i> |     | 4     | 200       |
| <i>ycjU</i> |     | 4     | 200       |
| <i>rpe</i>  |     | 4     | 200       |
| <i>proW</i> |     | 2     | 210       |
| <i>pstA</i> |     | 2     | 210       |
| <i>vacJ</i> |     | 2     | 210       |
| <i>hscA</i> |     | 2A    | 210       |
| <i>rimK</i> |     | 3     | 210       |
| <i>rpmJ</i> |     | 3     | 210       |
| <i>yheM</i> |     | 3     | 210       |
| <i>mraW</i> |     | 4     | 210       |
| <i>pgaC</i> |     | 4     | 210       |
| <i>ygcO</i> |     | 4     | 210       |
| <i>cedA</i> |     | 5     | 210       |
| <i>flhD</i> |     | 5     | 210       |
| <i>rsmF</i> |     | 5     | 210       |
| <i>ylcG</i> |     | 6     | 210       |
| JW5115      |     | 7     | 210       |
| <i>ybeY</i> |     | 7     | 210       |
| <i>yihL</i> |     | 7     | 210       |
| <i>ybgF</i> |     | 2     | >210      |
| <i>rrmJ</i> |     | 3     | >210      |
| <i>fdx</i>  |     | 4     | >210      |
| <i>fidB</i> |     | 4     | >210      |
| <i>ydiI</i> |     | 4     | >210      |
| <i>xapR</i> |     | 5     | >210      |
| <i>yciT</i> |     | 5     | >210      |
| <i>ybgT</i> |     | 7     | >210      |
| <i>pstS</i> |     | 2     | 220       |
| <i>qmcA</i> |     | 2     | 220       |
| <i>smpA</i> |     | 2     | 220       |
| <i>yneE</i> |     | 2     | 220       |
| <i>dnaK</i> |     | 2A    | 220       |
| <i>ybeD</i> |     | 7     | 220       |
| <i>ycbK</i> |     | 7     | 220       |

SUPPLEMENTARY TABLE 19. Chloramphenicol sensitive strains

| Gene        | CHL | Categ | MIC $\mu\text{g/ml}$ |
|-------------|-----|-------|----------------------|
| BW25113     |     |       | 8                    |
| <i>acrA</i> |     | 2     | 1.25                 |
| <i>tolC</i> |     | 2     | 1.25                 |
| <i>yciM</i> |     | 7     | 1.25                 |
| <i>recA</i> |     | 1     | $\leq 2.5$           |
| <i>acrB</i> |     | 2     | $\leq 2.5$           |
| <i>argO</i> |     | 2     | $\leq 2.5$           |
| <i>flgF</i> |     | 2     | $\leq 2.5$           |
| <i>rfaE</i> |     | 2     | $\leq 2.5$           |
| <i>ybgF</i> |     | 2     | $\leq 2.5$           |
| <i>rfaG</i> |     | 3     | $\leq 2.5$           |
| <i>rimK</i> |     | 3     | $\leq 2.5$           |
| <i>rpsF</i> |     | 3     | $\leq 2.5$           |
| <i>gmhB</i> |     | 4     | $\leq 2.5$           |
| <i>lpdA</i> |     | 4     | $\leq 2.5$           |
| <i>ycjU</i> |     | 4     | $\leq 2.5$           |
| <i>ygcO</i> |     | 4     | $\leq 2.5$           |
| <i>dksA</i> |     | 5     | $\leq 2.5$           |
| <i>hns</i>  |     | 5     | $\leq 2.5$           |
| <i>oxyR</i> |     | 5     | $\leq 2.5$           |
| <i>rfaH</i> |     | 5     | $\leq 2.5$           |
| <i>xapR</i> |     | 5     | $\leq 2.5$           |
| <i>yciT</i> |     | 5     | $\leq 2.5$           |
| <i>dedD</i> |     | 2     | 2.5                  |
| <i>nlpC</i> |     | 2     | 2.5                  |
| <i>ppiD</i> |     | 2     | 2.5                  |
| <i>qmcA</i> |     | 2     | 2.5                  |
| <i>rfaC</i> |     | 2     | 2.5                  |
| <i>rfaD</i> |     | 2     | 2.5                  |
| <i>yceK</i> |     | 2     | 2.5                  |
| <i>ydcS</i> |     | 2     | 2.5                  |
| <i>surA</i> |     | 2A    | 2.5                  |
| <i>rplA</i> |     | 3     | 2.5                  |
| <i>pnp</i>  |     | 3A    | 2.5                  |
| <i>cydB</i> |     | 4     | 2.5                  |
| <i>pta</i>  |     | 4     | 2.5                  |
| <i>tktA</i> |     | 4     | 2.5                  |
| <i>ubiG</i> |     | 4     | 2.5                  |
| <i>ydjI</i> |     | 4     | 2.5                  |
| <i>ygcO</i> |     | 4     | 2.5                  |
| <i>hfq</i>  |     | 5     | 2.5                  |
| JW5115      |     | 7     | 2.5                  |
| <i>yjjY</i> |     | 7     | 2.5                  |
| <i>dam</i>  |     | 1     | $> 2.5$              |
| <i>alaS</i> |     | 3     | $> 2.5$              |
| <i>elaD</i> |     | 3     | $> 2.5$              |
| <i>phoP</i> |     | 3     | $> 2.5$              |
| <i>dapF</i> |     | 4     | $> 2.5$              |
| <i>iscS</i> |     | 4     | $> 2.5$              |
| <i>nusB</i> |     | 5     | $> 2.5$              |

SUPPLEMENTARY TABLE 20. Erythromycin sensitive strains

| Gene        | ERY | Categ | MIC µg/ml |
|-------------|-----|-------|-----------|
| BW25113     |     |       | 150       |
| <i>acrA</i> |     | 2     | 50        |
| <i>acrB</i> |     | 2     | 50        |
| <i>tolC</i> |     | 2     | 50        |
| <i>bamB</i> |     | 2     | 50        |
| <i>lpxL</i> |     | 2     | 50        |
| <i>rfaC</i> |     | 2     | 50        |
| <i>rfaD</i> |     | 2     | 50        |
| <i>rfaE</i> |     | 2     | 50        |
| <i>surA</i> |     | 2A    | 50        |
| <i>yfgC</i> |     | 3     | 50        |
| <i>ycjU</i> |     | 4     | 50        |
| <i>pnp</i>  |     | 4     | 50        |
| <i>rpe</i>  |     | 4     | 50        |
| <i>hfq</i>  |     | 5     | 50        |
| <i>hns</i>  |     | 5     | 50        |
| <i>xapR</i> |     | 5     | 50        |
| <i>ybeY</i> |     | 7     | 50        |
| <i>yciM</i> |     | 7     | 50        |
| <i>minC</i> |     | 1A, 2 | 70        |
| <i>csgG</i> |     | 2     | 70        |
| <i>lpxM</i> |     | 2     | 100       |
| <i>gmhB</i> |     | 4     | 70        |
| <i>pyrF</i> |     | 4     | 70        |
| <i>fur</i>  |     | 5     | 70        |
| <i>nusB</i> |     | 5     | 70        |
| <i>zapB</i> |     | 5     | >70       |
| <i>envC</i> |     | 2     | 75        |
| <i>pstA</i> |     | 2     | 75        |
| <i>tatC</i> |     | 2     | 75        |
| <i>dnaK</i> |     | 2A    | 75        |
| <i>gpmM</i> |     | 4     | 70        |
| <i>ftsP</i> |     | 1A    | 100       |
| <i>hrpA</i> |     | 1A    | 100       |
| <i>argO</i> |     | 2     | 100       |
| <i>dedD</i> |     | 2     | 100       |
| <i>glcA</i> |     | 2     | 100       |
| <i>plsX</i> |     | 2     | 100       |
| <i>pstS</i> |     | 2     | 100       |
| <i>tolR</i> |     | 2     | 100       |
| <i>rimK</i> |     | 3     | 100       |
| <i>rpmJ</i> |     | 3     | 100       |
| <i>pcnB</i> |     | 3A    | 100       |
| <i>atpG</i> |     | 4     | 100       |
| <i>dapF</i> |     | 4     | 100       |
| <i>nagA</i> |     | 4     | 100       |
| <i>rpiA</i> |     | 4     | 100       |
| <i>tktA</i> |     | 4     | 100       |
| <i>yicP</i> |     | 4     | 100       |
| <i>rfaH</i> |     | 5     | 100       |
| <i>yciT</i> |     | 5     | 100       |
| <i>ymfT</i> |     | 6     | 100       |
| <i>ycbW</i> |     | 7     | 100       |
| <i>yhhA</i> |     | 7     | 100       |
| <i>yjjY</i> |     | 7     | 100       |

SUPPLEMENTARY TABLE 21. Fusidic Acid sensitive strains

| Gene        | FUS | Categ | MIC $\mu\text{g/ml}$ |
|-------------|-----|-------|----------------------|
| BW25113     |     |       | 300                  |
| <i>acrA</i> |     | 2     | 10                   |
| <i>acrB</i> |     | 2     | 10                   |
| <i>toiC</i> |     | 2     | 10                   |
| <i>envC</i> |     | 2     | 10                   |
| <i>rfaC</i> |     | 2     | 10                   |
| <i>rfaD</i> |     | 2     | 10                   |
| <i>rfaE</i> |     | 2     | 10                   |
| <i>yciM</i> |     | 7     | 10                   |
| <i>bamB</i> |     | 2     | 50                   |
| <i>dedD</i> |     | 2     | 50                   |
| <i>pstS</i> |     | 2     | 50                   |
| <i>rplA</i> |     | 3     | 50                   |
| <i>ubiG</i> |     | 4     | 50                   |
| <i>lpxL</i> |     | 2     | 50-70                |
| <i>fabF</i> |     | 4     | 70                   |
| <i>gmhB</i> |     | 4     | 70                   |
| <i>yfgC</i> |     | 3     | 80                   |
| <i>gpmM</i> |     | 4     | 80                   |
| <i>recA</i> |     | 1     | 100                  |
| <i>tatC</i> |     | 2     | 100                  |
| <i>dnaK</i> |     | 2A    | 100                  |
| <i>alaS</i> |     | 3     | 100                  |
| <i>rimK</i> |     | 3     | 100                  |
| <i>rplI</i> |     | 3     | 100                  |
| <i>rpmE</i> |     | 3     | 100                  |
| <i>rpsF</i> |     | 3     | 100                  |
| <i>rhlB</i> |     | 3A    | 100                  |
| <i>atpG</i> |     | 4     | 100                  |
| <i>mraW</i> |     | 4     | 100                  |
| <i>dksA</i> |     | 5     | 100                  |
| <i>fur</i>  |     | 5     | 100                  |
| <i>xapR</i> |     | 5     | 100                  |
| JW5115      |     | 7     | 100                  |
| <i>recB</i> |     | 1     | >100                 |
| <i>recC</i> |     | 1     | >100                 |
| <i>qmcA</i> |     | 2     | >100                 |
| <i>tatB</i> |     | 2     | >100                 |
| <i>toiR</i> |     | 2     | >100                 |
| <i>fkpB</i> |     | 2A    | >100                 |
| <i>skp</i>  |     | 2A    | >100                 |
| <i>surA</i> |     | 2A    | >100                 |
| <i>rpmG</i> |     | 3     | >100                 |
| <i>rpsO</i> |     | 3     | >100                 |
| <i>lpdA</i> |     | 4     | >100                 |
| <i>ybeD</i> |     | 7     | >100                 |
| <i>ycbW</i> |     | 7     | >100                 |

SUPPLEMENTARY TABLE 22. Triclosan sensitive strains

| Gene        | TRI | Categ | MIC ng/ml |
|-------------|-----|-------|-----------|
| BW25113     |     |       | 60        |
| <i>rfaC</i> |     | 2     | 10        |
| <i>rfaE</i> |     | 2     | 10        |
| <i>tolC</i> |     | 2     | 10        |
| <i>dam</i>  |     | 1     | 20        |
| <i>acrB</i> |     | 2     | 20        |
| <i>lpxL</i> |     | 2     | 20        |
| <i>nlpC</i> |     | 2     | 20        |
| <i>rfaD</i> |     | 2     | 20        |
| <i>rimK</i> |     | 3     | 20        |
| <i>glpD</i> |     | 4     | 20        |
| <i>dksA</i> |     | 5     | 20        |
| <i>rfaH</i> |     | 5     | 20        |
| <i>acrA</i> |     | 2     | 27        |
| <i>envZ</i> |     | 2     | 27        |
| <i>ybgF</i> |     | 2     | 27        |
| <i>ybjJ</i> |     | 2     | 27        |
| <i>dnaJ</i> |     | 2A    | 27        |
| <i>cydB</i> |     | 4     | 27        |
| <i>ycjU</i> |     | 4     | 27        |
| <i>hfq</i>  |     | 5     | 27        |
| <i>rseA</i> |     | 5     | 27        |
| <i>yciT</i> |     | 5     | 27        |
| <i>yciM</i> |     | 7     | 27        |
| <i>recA</i> |     | 1     | 30        |
| <i>ruvA</i> |     | 1     | 30        |
| <i>minC</i> |     | 1A, 2 | 30        |
| <i>dedD</i> |     | 2     | 30        |
| <i>proW</i> |     | 2     | 30        |
| <i>qmcA</i> |     | 2     | 30        |
| <i>rfaG</i> |     | 2     | 30        |
| <i>rfaY</i> |     | 2     | 30        |
| <i>yceK</i> |     | 2     | 30        |
| <i>yhdP</i> |     | 2     | 30        |
| <i>yneE</i> |     | 2     | 30        |
| <i>dnaK</i> |     | 2A    | 30        |
| <i>hlpA</i> |     | 2A    | 30        |
| <i>dusB</i> |     | 3     | 30        |
| <i>pstC</i> |     | 3     | 30        |
| <i>rpmF</i> |     | 3     | 30        |
| <i>yfgC</i> |     | 3     | 30        |
| <i>rhlB</i> |     | 3A    | 30        |
| <i>lpdA</i> |     | 4     | 30        |
| <i>nagA</i> |     | 4     | 30        |
| <i>ubiG</i> |     | 4     | 30        |
| <i>ygcO</i> |     | 4     | 30        |
| <i>fur</i>  |     | 5     | 30        |
| <i>hdfR</i> |     | 5     | 30        |
| <i>rsmE</i> |     | 5     | 30        |
| <i>seqA</i> |     | 5     | 30        |
| <i>ybeD</i> |     | 7     | 30        |
| <i>yceD</i> |     | 7     | 30        |
| <i>recB</i> |     | 1     | >30       |
| <i>fisP</i> |     | 1A    | >30       |
| <i>ddlB</i> |     | 2     | >30       |
| <i>envC</i> |     | 2     | >30       |
| <i>fruB</i> |     | 2     | >30       |
| <i>glcA</i> |     | 2     | >30       |
| <i>lpxM</i> |     | 2     | >30       |

| Gene        | TRI | Categ | MIC ng/ml |
|-------------|-----|-------|-----------|
| <i>ppiB</i> |     | 2     | >30       |
| <i>tatC</i> |     | 2     | 30        |
| <i>tolR</i> |     | 2     | >30       |
| <i>ydcS</i> |     | 2     | >30       |
| <i>yraI</i> |     | 2A    | >30       |
| <i>pstA</i> |     | 3     | >30       |
| <i>pstS</i> |     | 3     | >30       |
| <i>rplA</i> |     | 3     | >30       |
| <i>rplI</i> |     | 3     | >30       |
| <i>rpmE</i> |     | 3     | >30       |
| <i>rpmG</i> |     | 3     | >30       |
| <i>rrmJ</i> |     | 3     | >30       |
| <i>cyaA</i> |     | 4     | >30       |
| <i>gpmM</i> |     | 4     | >30       |
| <i>rpe</i>  |     | 4     | >30       |
| <i>cspE</i> |     | 5     | >30       |
| <i>hns</i>  |     | 5     | >30       |
| <i>rsmF</i> |     | 5     | >30       |
| <i>ylcG</i> |     | 6     | >30       |
| <i>ymfT</i> |     | 6     | >30       |
| <i>yaiU</i> |     | 7     | >30       |
| <i>yebV</i> |     | 7     | >30       |
